# Supplementary material for: Predicting Turns in Proteins with a Unified Model
Source: PLoS One. 2012 Nov 7;7(11):e48389. doi: 10.1371/journal.pone.0048389 (PMC3492357; doi:10.1371/journal.pone.0048389)
Supplement: Table S1 — PDB ID list of Train_0925. (DOCX) [file pone.0048389.s005.docx]

Table S1. PDB ID list of Train_0925

| PDB ID | PDB ID | PDB ID | PDB ID | PDB ID | PDB ID | PDB ID |
| --- | --- | --- | --- | --- | --- | --- |
| | 1A12A | | --- | | 1A1XA | | 1A3AA | | 1A3CA | | 1A4IA | | 1A53A | | 1A62A | | 1A8DA | | 1A8LA | | 1A92A | | 1A9XB | | 1ABAA | | 1AE9A | | 1AH7A | | 1AHOA | | 1AK0A | | 1AL3A | | 1ALUA | | 1AMFA | | 1AOCA | | 1AOLA | | 1AOPA | | 1AQZA | | 1ARBA | | 1ATGA | | 1ATZA | | 1AYOA | | 1AZOA | | 1B0NB | | 1B12A | | 1B1CA | | 1B25A | | 1B3AA | | 1B43A | | 1B4FA | | 1B5EA | | 1B6AA | | 1B8ZA | | | 1B9WA | | --- | | 1BAMA | | 1BAZA | | 1BEAA | | 1BF2A | | 1BGCA | | 1BGFA | | 1BKRA | | 1BM8A | | 1BRTA | | 1BTKA | | 1BTNA | | 1BU8A | | 1BUPA | | 1BX7A | | 1BXYA | | 1BYIA | | 1BYRA | | 1C1DA | | 1C1KA | | 1C1LA | | 1C1YB | | 1C3CA | | 1C4QA | | 1C5EA | | 1C75A | | 1C7KA | | 1C7SA | | 1C96A | | 1CB8A | | 1CC8A | | 1CCWA | | 1CCWB | | 1CDCA | | 1CEOA | | 1CEWI | | 1CFBA | | 1CHDA | | | 1CHMA | | --- | | 1CI4A | | 1CMCA | | 1COZA | | 1CQ3A | | 1CQMA | | 1CQQA | | 1CQYA | | 1CS1A | | 1CTFA | | 1CUJA | | 1CV8A | | 1CVRA | | 1CXQA | | 1CY5A | | 1CZPA | | 1CZYA | | 1D0CA | | 1D0DA | | 1D0QA | | 1D2NA | | 1D2OA | | 1D2SA | | 1D2TA | | 1D2VA | | 1D2VC | | 1D3BB | | 1D3YA | | 1D4OA | | 1D4TA | | 1D5TA | | 1D7PM | | 1D8HA | | 1D8WA | | 1DCIA | | 1DCSA | | 1DD9A | | 1DDWA | | | 1DEKA | | --- | | 1DF4A | | 1DG6A | | 1DGWX | | 1DGWY | | 1DJ0A | | 1DJ8A | | 1DK8A | | 1DLWA | | 1DMGA | | 1DMHA | | 1DNLA | | 1DOWA | | 1DP4A | | 1DPGA | | 1DQGA | | 1DQPA | | 1DQTA | | 1DQZA | | 1DS1A | | 1DTDB | | 1DUVG | | 1DVOA | | 1DWKA | | 1DY5A | | 1DZFA | | 1DZKA | | 1E19A | | 1E29A | | 1E2KA | | 1E2WA | | 1E4CP | | 1E4FT | | 1E58A | | 1E5KA | | 1E6UA | | 1E7LA | | 1E8CA | | | 1E8YA | | --- | | 1EAQA | | 1EARA | | 1EAYC | | 1EB6A | | 1ECAA | | 1EE8A | | 1EERA | | 1EEXA | | 1EEXB | | 1EEXG | | 1EF1C | | 1EF8A | | 1EFDN | | 1EJDA | | 1EJGA | | 1EKQA | | 1EL6A | | 1ELKA | | 1ELUA | | 1ELWA | | 1EOKA | | 1EQ2A | | 1ERZA | | 1ES5A | | 1ES6A | | 1ES9A | | 1EU1A | | 1EU8A | | 1EUVA | | 1EUWA | | 1EVFA | | 1EVLA | | 1EVXA | | 1EW4A | | 1EWFA | | 1EX0A | | 1EX2A | | | 1EXTA | | --- | | 1EYBA | | 1EYHA | | 1EYQA | | 1EZ3A | | 1EZGA | | 1EZIA | | 1EZWA | | 1F00I | | 1F0XA | | 1F1EA | | 1F1MA | | 1F2DA | | 1F2LA | | 1F2TB | | 1F32A | | 1F3UA | | 1F3UB | | 1F3VA | | 1F46A | | 1F5MA | | 1F5NA | | 1F5VA | | 1F60B | | 1F7LA | | 1F86A | | 1F8EA | | 1F94A | | 1F9VA | | 1FC3A | | 1FCQA | | 1FD0A | | 1FD3A | | 1FIPA | | 1FITA | | 1FJ2A | | 1FK5A | | 1FKMA | | | 1FL0A | | --- | | 1FLMA | | 1FM0D | | 1FM0E | | 1FN9A | | 1FNNA | | 1FO8A | | 1FOBA | | 1FP2A | | 1FPOA | | 1FS7A | | 1FSGA | | 1FT5A | | 1FTRA | | 1FVIA | | 1FX2A | | 1FXOA | | 1FYEA | | 1G12A | | 1G1TA | | 1G2RA | | 1G3KA | | 1G3PA | | 1G4MA | | 1G4YB | | 1G55A | | 1G5AA | | 1G5HA | | 1G60A | | 1G61A | | 1G66A | | 1G6HA | | 1G6UA | | 1G6XA | | 1G73A | | 1G7SA | | 1G8EA | | 1G8KA | |
| | 1G8LA | | --- | | 1G8MA | | 1G8QA | | 1G9GA | | 1GA6A | | 1GA8A | | 1GAKA | | 1GBSA | | 1GCIA | | 1GK9A | | 1GK9B | | 1GKMA | | 1GKPA | | 1GL2C | | 1GMUA | | 1GMXA | | 1GNLA | | 1GNYA | | 1GO3F | | 1GOTG | | 1GP0A | | 1GP6A | | 1GPPA | | 1GPRA | | 1GQEA | | 1GQIA | | 1GS5A | | 1GS9A | | 1GSAA | | 1GSOA | | 1GTKA | | 1GTTA | | 1GTVA | | 1GU2A | | 1GU7A | | 1GUDA | | 1GUQA | | 1GUTA | | 1GV9A | | 1GVDA | | 1GVJA | | 1GVNA | | 1GVPA | | 1GWEA | | | 1GWMA | | --- | | 1GWUA | | 1GWYA | | 1GXJA | | 1GXMA | | 1GXRA | | 1GXUA | | 1GXYA | | 1GY7A | | 1GYXA | | 1H03P | | 1H05A | | 1H0HB | | 1H16A | | 1H1NA | | 1H2SB | | 1H2VC | | 1H2WA | | 1H32A | | 1H4AX | | 1H4GA | | 1H4RA | | 1H4XA | | 1H6LA | | 1H72C | | 1H7CA | | 1H7EA | | 1H8PA | | 1H97A | | 1H99A | | 1HBNA | | 1HBNB | | 1HBNC | | 1HDHA | | 1HDOA | | 1HE1A | | 1HF8A | | 1HFES | | 1HH8A | | 1HHSA | | 1HM9A | | 1HN0A | | 1HNJA | | 1HP1A | | | 1HQ0A | | --- | | 1HQSA | | 1HTRP | | 1HUFA | | 1HUWA | | 1HX0A | | 1HX1B | | 1HX6A | | 1HXIA | | 1HXNA | | 1HXRA | | 1HYOA | | 1HYPA | | 1HZ4A | | 1HZ6A | | 1HZTA | | 1I0RA | | 1I0VA | | 1I12A | | 1I1JA | | 1I1WA | | 1I24A | | 1I27A | | 1I2AA | | 1I2KA | | 1I2TA | | 1I36A | | 1I3CA | | 1I4JA | | 1I4MA | | 1I4UA | | 1I52A | | 1I58A | | 1I60A | | 1I6LA | | 1I71A | | 1I7WB | | 1I88A | | 1I8AA | | 1I8OA | | 1IA9A | | 1IAPA | | 1IBYA | | 1IC2A | | | 1IDPA | | --- | | 1IFRA | | 1IG0A | | 1IGQA | | 1IHZA | | 1II5A | | 1IIBA | | 1IJBA | | 1IJYA | | 1IM5A | | 1IN4A | | 1INLA | | 1IO0A | | 1IOMA | | 1IQZA | | 1IRQA | | 1ISPA | | 1ISUA | | 1ITVA | | 1ITXA | | 1IUQA | | 1IWLA | | 1IWMA | | 1IX9A | | 1IZCA | | 1IZMA | | 1J0HA | | 1J0PA | | 1J1NA | | 1J1TA | | 1J24A | | 1J27A | | 1J2JB | | 1J2LA | | 1J2RA | | 1J30A | | 1J34C | | 1J3AA | | 1J3WA | | 1J5PA | | 1J5UA | | 1J5WA | | 1J77A | | 1J7XA | | | 1J8BA | | --- | | 1J8RA | | 1J98A | | 1JBEA | | 1JBOA | | 1JCDA | | 1JDHA | | 1JDWA | | 1JE5A | | 1JEKA | | 1JETA | | 1JF3A | | 1JF8A | | 1JFBA | | 1JG1A | | 1JH6A | | 1JHFA | | 1JHGA | | 1JHJA | | 1JHSA | | 1JI7A | | 1JIWI | | 1JIXA | | 1JKEA | | 1JKXA | | 1JL0A | | 1JL1A | | 1JM0A | | 1JMKC | | 1JMVA | | 1JMXB | | 1JNDA | | 1JNIA | | 1JO0A | | 1JOSA | | 1JOVA | | 1JQ5A | | 1JR2A | | 1JR7A | | 1JR8A | | 1JSDA | | 1JSDB | | 1JU3A | | 1JUVA | | | 1JWQA | | --- | | 1JX6A | | 1JY1A | | 1JY2N | | 1JY2O | | 1JY2P | | 1JYAA | | 1JYEA | | 1JYHA | | 1JYKA | | 1JYOA | | 1JYOE | | 1JZTA | | 1K04A | | 1K07A | | 1K0MA | | 1K2XA | | 1K2XB | | 1K32A | | 1K3SA | | 1K3YA | | 1K4IA | | 1K4NA | | 1K55C | | 1K5CA | | 1K5NA | | 1K77A | | 1K7CA | | 1K7JA | | 1K7WA | | 1K8KC | | 1K8KD | | 1K8KE | | 1K8KF | | 1K8KG | | 1K92A | | 1KA1A | | 1KAEA | | 1KAFA | | 1KCMA | | 1KGDA | | 1KHCA | | 1KHXA | | 1KHYA | | | 1KIDA | | --- | | 1KJQA | | 1KKOA | | 1KLXA | | 1KMOA | | 1KMTA | | 1KMVA | | 1KNGA | | 1KOEA | | 1KOLA | | 1KP6A | | 1KPFA | | 1KPTA | | 1KQ1A | | 1KQ6A | | 1KQFC | | 1KQPA | | 1KQRA | | 1KS8A | | 1KS9A | | 1KSHB | | 1KT6A | | 1KU3A | | 1KV7A | | 1KVEA | | 1KVEB | | 1KW4A | | 1KWFA | | 1KXOA | | 1KYFA | | 1KZFA | | 1KZQA | | 1L1EA | | 1L1LA | | 1L3KA | | 1L3PA | | 1L5OA | | 1L6PA | | 1L6RA | | 1L7AA | | 1L7DA | | 1L7LA | | 1L9LA | | 1L9XA | |
| | 1LAMA | | --- | | 1LBUA | | 1LC0A | | 1LC5A | | 1LDDA | | 1LFPA | | 1LFWA | | 1LKIA | | 1LKKA | | 1LL2A | | 1LLFA | | 1LM5A | | 1LM8B | | 1LM8V | | 1LMIA | | 1LMLA | | 1LNIA | | 1LO7A | | 1LQTA | | 1LQVA | | 1LS1A | | 1LSHA | | 1LSHB | | 1LSLA | | 1LSTA | | 1LTZA | | 1LU4A | | 1LUCA | | 1LUGA | | 1LUZA | | 1LV7A | | 1LWBA | | 1LXJA | | 1LYQA | | 1LYVA | | 1LZLA | | 1M0DA | | 1M0KA | | 1M0WA | | 1M15A | | 1M1FA | | 1M1HA | | 1M1NA | | 1M1NB | | | 1M1QA | | --- | | 1M22A | | 1M2DA | | 1M40A | | 1M48A | | 1M4JA | | 1M4LA | | 1M4TA | | 1M55A | | 1M5WA | | 1M65A | | 1M7YA | | 1M93C | | 1M9ZA | | 1MAIA | | 1MBMA | | 1MC2A | | 1MDCA | | 1MF7A | | 1MG4A | | 1MG7A | | 1MGTA | | 1MIXA | | 1MJ4A | | 1MJ5A | | 1MK0A | | 1MK4A | | 1MKAA | | 1MKKA | | 1MLAA | | 1MMLA | | 1MN8A | | 1MOFA | | 1MPGA | | 1MQOA | | 1MSCA | | 1MTPA | | 1MTPB | | 1MTYB | | 1MTYD | | 1MTYG | | 1MUNA | | 1MUWA | | 1MV8A | | | 1MVFD | | --- | | 1MVLA | | 1MW9X | | 1MWPA | | 1MWQA | | 1MXIA | | 1MXRA | | 1MY7A | | 1MZ9A | | 1N08A | | 1N0QA | | 1N0WA | | 1N13A | | 1N13B | | 1N1FA | | 1N1JA | | 1N2DC | | 1N2ZA | | 1N3LA | | 1N40A | | 1N4WA | | 1N5UA | | 1N62A | | 1N62B | | 1N62C | | 1N7SA | | 1N7SB | | 1N7SC | | 1N7SD | | 1N7ZA | | 1N8VA | | 1N93X | | 1N9PA | | 1NBAA | | 1NC5A | | 1NE9A | | 1NEPA | | 1NF9A | | 1NFPA | | 1NG6A | | 1NIGA | | 1NIJA | | 1NJHA | | 1NJRA | | | 1NKDA | | --- | | 1NKGA | | 1NKIA | | 1NKRA | | 1NKZA | | 1NKZB | | 1NLNA | | 1NLQA | | 1NLSA | | 1NNFA | | 1NNLA | | 1NNWA | | 1NNXA | | 1NOFA | | 1NP6A | | 1NPYA | | 1NQJA | | 1NR0A | | 1NRJA | | 1NRJB | | 1NSJA | | 1NSZA | | 1NTHA | | 1NTVA | | 1NTYA | | 1NU0A | | 1NU4A | | 1NUYA | | 1NWAA | | 1NWWA | | 1NWZA | | 1NXMA | | 1NYCA | | 1NYKA | | 1NYTA | | 1NZ0A | | 1NZJA | | 1NZYA | | 1O08A | | 1O13A | | 1O1YA | | 1O22A | | 1O26A | | 1O2DA | | | 1O4TA | | --- | | 1O4WA | | 1O66A | | 1O6AA | | 1O6DA | | 1O75A | | 1O7IA | | 1O7JA | | 1O7QA | | 1O82A | | 1O8BA | | 1O97C | | 1O97D | | 1OA8A | | 1OAIA | | 1OAOC | | 1OBBA | | 1OBOA | | 1OCYA | | 1OD3A | | 1OD6A | | 1ODMA | | 1OEWA | | 1OEYA | | 1OEYJ | | 1OF8A | | 1OFCX | | 1OFLA | | 1OGDA | | 1OGOX | | 1OGQA | | 1OH0A | | 1OI0A | | 1OI2A | | 1OI7A | | 1OIHA | | 1OISA | | 1OJHA | | 1OK0A | | 1OK7A | | 1OKSA | | 1OLZA | | 1ON3A | | 1ONWA | | | 1OO0A | | --- | | 1OO0B | | 1OOEA | | 1OOHA | | 1OOYA | | 1OPCA | | 1OQ1A | | 1OQJA | | 1OQVA | | 1OR7C | | 1ORSC | | 1ORUA | | 1OSYA | | 1OTKA | | 1OU8A | | 1OW1A | | 1OW4A | | 1OWLA | | 1OX0A | | 1OYGA | | 1OYWA | | 1OZ2A | | 1P1JA | | 1P1MA | | 1P1XA | | 1P3CA | | 1P3DA | | 1P57A | | 1P5DX | | 1P5VA | | 1P5VB | | 1P5ZB | | 1P6OA | | 1P7TA | | 1P90A | | 1P9GA | | 1P9HA | | 1PBJA | | 1PBWA | | 1PBYA | | 1PBYC | | 1PCFA | | 1PDOA | | 1PE9A | | | 1PFBA | | --- | | 1PG4A | | 1PG6A | | 1PGSA | | 1PINA | | 1PJXA | | 1PK6A | | 1PKHA | | 1PL3A | | 1PM4A | | 1PMHX | | 1PO5A | | 1POCA | | 1PP0A | | 1PQ7A | | 1PQHA | | 1PSRA | | 1PSWA | | 1PTMA | | 1PU6A | | 1PUCA | | 1PV5A | | 1PVGA | | 1PX4A | | 1PX5A | | 1PZ4A | | 1PZ7A | | 1PZWA | | 1Q0PA | | 1Q0RA | | 1Q16A | | 1Q1FA | | 1Q2HA | | 1Q33A | | 1Q35A | | 1Q40B | | 1Q5YA | | 1Q5ZA | | 1Q6OA | | 1Q6ZA | | 1Q7EA | | 1Q7FA | | 1Q7LA | | 1Q7LB | |
| | 1Q8BA | | --- | | 1Q8DA | | 1Q8FA | | 1Q8IA | | 1Q9UA | | 1QAZA | | 1QB5D | | 1QCSA | | 1QD1A | | 1QDDA | | 1QF8A | | 1QG8A | | 1QGEE | | 1QGIA | | 1QGVA | | 1QHDA | | 1QJ8A | | 1QJPA | | 1QKRA | | 1QKSA | | 1QL0A | | 1QLMA | | 1QLWA | | 1QMYA | | 1QNRA | | 1QO2A | | 1QOPB | | 1QOYA | | 1QQ5A | | 1QQFA | | 1QQP1 | | 1QQP2 | | 1QQP3 | | 1QQP4 | | 1QR0A | | 1QREA | | 1QSTA | | 1QTWA | | 1QU9A | | 1QUSA | | 1QV9A | | 1QW2A | | 1QW9A | | 1QWGA | | | 1QWOA | | --- | | 1QWYA | | 1QX4A | | 1QXMA | | 1QZMA | | 1R0DA | | 1R0RI | | 1R0UA | | 1R17A | | 1R1HA | | 1R29A | | 1R3FA | | 1R4PA | | 1R4VA | | 1R4XA | | 1R5LA | | 1R5MA | | 1R6DA | | 1R6JA | | 1R6WA | | 1R6XA | | 1R75A | | 1R77A | | 1R7AA | | 1R7JA | | 1R7LA | | 1R8SA | | 1R9LA | | 1R9WA | | 1RA0A | | 1RCQA | | 1REGX | | 1REQB | | 1RF6A | | 1RFYA | | 1RG8A | | 1RGXA | | 1RGZA | | 1RI6A | | 1RIFA | | 1RK6A | | 1RK8C | | 1RKIA | | 1RMGA | | | 1RO0A | | --- | | 1RO7A | | 1ROCA | | 1RQBA | | 1RSSA | | 1RT8A | | 1RTQA | | 1RTTA | | 1RU4A | | 1RUTX | | 1RV9A | | 1RW1A | | 1RW7A | | 1RWHA | | 1RWIA | | 1RWJA | | 1RWRA | | 1RWZA | | 1RXQA | | 1RY9A | | 1RYIA | | 1RYLA | | 1RYOA | | 1RYQA | | 1RZHH | | 1RZHM | | 1S0IA | | 1S12A | | 1S1DA | | 1S21A | | 1S29A | | 1S2XA | | 1S3CA | | 1S4KA | | 1S5AA | | 1S5DA | | 1S5UA | | 1S7IA | | 1S7KA | | 1S7ZA | | 1S99A | | 1S9RA | | 1S9UA | | 1SAUA | | | 1SBPA | | --- | | 1SBXA | | 1SBYA | | 1SBZA | | 1SD4A | | 1SDIA | | 1SDOA | | 1SE8A | | 1SEIA | | 1SENA | | 1SFPA | | 1SFSA | | 1SG4A | | 1SG6A | | 1SH8A | | 1SJWA | | 1SJYA | | 1SKZA | | 1SL8A | | 1SLUA | | 1SMBA | | 1SMXA | | 1SQ9A | | 1SQSA | | 1SQWA | | 1SR4A | | 1SR8A | | 1SRAA | | 1SS4A | | 1SSQA | | 1STMA | | 1SU8A | | 1SUMB | | 1SURA | | 1SUUA | | 1SVBA | | 1SVFA | | 1SVMA | | 1SW5A | | 1SYYA | | 1SZ7A | | 1SZHA | | 1SZWA | | 1T06A | | | 1T07A | | --- | | 1T0BA | | 1T0FA | | 1T0FC | | 1T0HA | | 1T0HB | | 1T0PB | | 1T0TV | | 1T15A | | 1T1DA | | 1T1JA | | 1T1UA | | 1T1VA | | 1T2DA | | 1T3TA | | 1T3YA | | 1T4AA | | 1T4BA | | 1T5RA | | 1T61A | | 1T6CA | | 1T6EX | | 1T6LA | | 1T6SA | | 1T6UA | | 1T7RA | | 1T8KA | | 1T8TA | | 1T92A | | 1T9FA | | 1TADA | | 1TAFA | | 1TAFB | | 1TBFA | | 1TC5A | | 1TE2A | | 1TFEA | | 1TG7A | | 1TGRA | | 1TH7A | | 1THFD | | 1THQA | | 1TI6B | | 1TIFA | | | 1TIGA | | --- | | 1TIQA | | 1TJLA | | 1TJXA | | 1TJYA | | 1TKEA | | 1TL2A | | 1TOAA | | 1TP6A | | 1TP9A | | 1TQGA | | 1TQHA | | 1TQJA | | 1TR0A | | 1TS9A | | 1TT8A | | 1TU1A | | 1TU9A | | 1TUAA | | 1TUKA | | 1TUOA | | 1TUWA | | 1TVXA | | 1TWDA | | 1TWUA | | 1TWYA | | 1TXGA | | 1TXLA | | 1TZPA | | 1TZYA | | 1TZYB | | 1U02A | | 1U07A | | 1U09A | | 1U0SA | | 1U14A | | 1U2HA | | 1U55A | | 1U5DA | | 1U5KA | | 1U5PA | | 1U5UA | | 1U5VA | | 1U5XA | | | 1U60A | | --- | | 1U6ZA | | 1U7GA | | 1U7IA | | 1U7KA | | 1U7LA | | 1U7PA | | 1U84A | | 1U8VA | | 1U9LA | | 1UALA | | 1UASA | | 1UC8A | | 1UCDA | | 1UCRA | | 1UCSA | | 1UD9A | | 1UEBA | | 1UEKA | | 1UFIA | | 1UFOA | | 1UFYA | | 1UG6A | | 1UGIA | | 1UGXA | | 1UI0A | | 1UIIA | | 1UIXA | | 1UJ2A | | 1UJ8A | | 1UJPA | | 1UK8A | | 1UKFA | | 1UKKA | | 1UMGA | | 1UNNC | | 1UNQA | | 1UOYA | | 1UPKA | | 1UPQA | | 1UPTB | | 1UQTA | | 1URSA | | 1US0A | |
| | 1US5A | | --- | | 1USCA | | 1USEA | | 1USGA | | 1USMA | | 1USRA | | 1UT7A | | 1UTEA | | 1UTGA | | 1UUJA | | 1UUQA | | 1UUYA | | 1UUZA | | 1UV7A | | 1UW4A | | 1UW4B | | 1UWCA | | 1UWFA | | 1UWKA | | 1UWWA | | 1UX6A | | 1UXOA | | 1UYLA | | 1UZ3A | | 1UZEA | | 1UZXA | | 1V05A | | 1V0AA | | 1V0WA | | 1V2BA | | 1V2XA | | 1V2ZA | | 1V33A | | 1V4AA | | 1V4PA | | 1V54A | | 1V54B | | 1V54C | | 1V54D | | 1V54E | | 1V54F | | 1V54G | | 1V54H | | 1V54I | | | 1V54J | | --- | | 1V54K | | 1V54L | | 1V54M | | 1V5IB | | 1V5VA | | 1V6PA | | 1V6SA | | 1V6TA | | 1V74A | | 1V74B | | 1V77A | | 1V7WA | | 1V84A | | 1V8HA | | 1V96A | | 1V9FA | | 1V9MA | | 1V9YA | | 1VAJA | | 1VBKA | | 1VBWA | | 1VCAA | | 1VCCA | | 1VD6A | | 1VDKA | | 1VDWA | | 1VE1A | | 1VE2A | | 1VE4A | | 1VEFA | | 1VFYA | | 1VGJA | | 1VGYA | | 1VH4A | | 1VH5A | | 1VHNA | | 1VHTA | | 1VHUA | | 1VHWA | | 1VI0A | | 1VI4A | | 1VI6A | | 1VI9A | | | 1VJFA | | --- | | 1VJLA | | 1VJNA | | 1VJUA | | 1VJVA | | 1VK1A | | 1VKEA | | 1VKFA | | 1VKHA | | 1VKKA | | 1VKMA | | 1VKNA | | 1VKYA | | 1VL1A | | 1VL7A | | 1VLPA | | 1VLSA | | 1VLYA | | 1VMBA | | 1VMEA | | 1VMGA | | 1VMHA | | 1VP8A | | 1VPBA | | 1VPRA | | 1VPSA | | 1VPTA | | 1VQSA | | 1VR7A | | 1VRAA | | 1VRAB | | 1VRMA | | 1VSRA | | 1VYBA | | 1VYIA | | 1VYKA | | 1VYRA | | 1VZIA | | 1VZMA | | 1VZYA | | 1W07A | | 1W0HA | | 1W0NA | | 1W1HA | | | 1W23A | | --- | | 1W2FA | | 1W2WA | | 1W2WB | | 1W2YA | | 1W3IA | | 1W4SA | | 1W4XA | | 1W53A | | 1W5QA | | 1W5RA | | 1W66A | | 1W6GA | | 1W6SA | | 1W6SB | | 1W78A | | 1W7CA | | 1W8KA | | 1W8SA | | 1W94A | | 1W96A | | 1W99A | | 1W9HA | | 1WA5B | | 1WA5C | | 1WAAA | | 1WAPA | | 1WB4A | | 1WBAA | | 1WBEA | | 1WBHA | | 1WC1A | | 1WC2A | | 1WCWA | | 1WD3A | | 1WDDA | | 1WDDS | | 1WDJA | | 1WDPA | | 1WEHA | | 1WERA | | 1WG8A | | 1WHIA | | 1WHSA | | | 1WHZA | | --- | | 1WIWA | | 1WJ9A | | 1WJXA | | 1WL8A | | 1WLEA | | 1WLGA | | 1WLJA | | 1WLUA | | 1WLZA | | 1WMHA | | 1WMHB | | 1WMWA | | 1WMXA | | 1WN2A | | 1WNAA | | 1WNYA | | 1WO8A | | 1WOCA | | 1WOJA | | 1WOLA | | 1WOQA | | 1WOUA | | 1WPAA | | 1WPBA | | 1WPNA | | 1WPVA | | 1WQ6A | | 1WQJB | | 1WRAA | | 1WRDA | | 1WS8A | | 1WT6A | | 1WTJA | | 1WUBA | | 1WUIL | | 1WUIS | | 1WURA | | 1WV3A | | 1WVFA | | 1WVGA | | 1WVHA | | 1WVQA | | 1WWIA | | | 1WWJA | | --- | | 1WWZA | | 1WXCA | | 1WXCB | | 1WY2A | | 1WZ3A | | 1WZDA | | 1WZUA | | 1X0TA | | 1X1NA | | 1X2IA | | 1X38A | | 1X54A | | 1X6IA | | 1X6OA | | 1X6ZA | | 1X7DA | | 1X8BA | | 1X8QA | | 1X91A | | 1X9DA | | 1X9IA | | 1XAKA | | 1XAUA | | 1XBIA | | 1XCLA | | 1XCRA | | 1XD3A | | 1XDNA | | 1XE7A | | 1XEWX | | 1XEWY | | 1XFFA | | 1XFKA | | 1XFSA | | 1XG0A | | 1XG0C | | 1XG4A | | 1XGKA | | 1XHNA | | 1XIWA | | 1XIZA | | 1XJJA | | 1XJUA | | | 1XKIA | | --- | | 1XKPA | | 1XKPB | | 1XKPC | | 1XKRA | | 1XKWA | | 1XLQA | | 1XLYA | | 1XMKA | | 1XMTA | | 1XODA | | 1XOVA | | 1XPPA | | 1XQAA | | 1XQOA | | 1XRUA | | 1XS0A | | 1XS5A | | 1XSVA | | 1XSZA | | 1XTTA | | 1XU1R | | 1XUBA | | 1XV2A | | 1XV5A | | 1XVHA | | 1XW3A | | 1XWVA | | 1XWWA | | 1XX1A | | 1XZZA | | 1Y08A | | 1Y0KA | | 1Y0NA | | 1Y0UA | | 1Y12A | | 1Y37A | | 1Y43B | | 1Y4WA | | 1Y5HA | | 1Y5IC | | 1Y60A | | 1Y66A | | 1Y6XA | |
| | 1Y6ZA | | --- | | 1Y71A | | 1Y7PA | | 1Y7TA | | 1Y8AA | | 1Y93A | | 1Y9LA | | 1YARA | | 1YARO | | 1YB0A | | 1YB3A | | 1YBKA | | 1YC5A | | 1YCDA | | 1YD0A | | 1YD9A | | 1YDGA | | 1YDIA | | 1YDYA | | 1YE8A | | 1YFQA | | 1YFUA | | 1YG9A | | 1YGAA | | 1YGTA | | 1YHTA | | 1YI9A | | 1YJ7A | | 1YKIA | | 1YLIA | | 1YLKA | | 1YLLA | | 1YLMA | | 1YLXA | | 1YM3A | | 1YMTA | | 1YN3A | | 1YNFA | | 1YNPA | | 1YO3A | | 1YOCA | | 1YOZA | | 1YPYA | | 1YQ5A | | | 1YQEA | | --- | | 1YQGA | | 1YQHA | | 1YQSA | | 1YRKA | | 1YRRA | | 1YSRA | | 1YT3A | | 1YT8A | | 1YTLA | | 1YU0A | | 1YU5X | | 1YUMA | | 1YW4A | | 1YWFA | | 1YX1A | | 1YZ1A | | 1YZXA | | 1Z0JB | | 1Z0MA | | 1Z0PA | | 1Z0WA | | 1Z1YA | | 1Z2NX | | 1Z2UA | | 1Z2WA | | 1Z3EA | | 1Z3EB | | 1Z3XA | | 1Z5ZA | | 1Z67A | | 1Z6MA | | 1Z6OA | | 1Z6OM | | 1Z70X | | 1Z72A | | 1Z96A | | 1Z9LA | | 1ZA0A | | 1ZARA | | 1ZAVA | | 1ZB1A | | 1ZC3B | | 1ZCEA | | | 1ZD0A | | --- | | 1ZD7A | | 1ZD8A | | 1ZDYA | | 1ZELA | | 1ZGKA | | 1ZHSA | | 1ZHVA | | 1ZHXA | | 1ZI8A | | 1ZJAA | | 1ZJCA | | 1ZK4A | | 1ZK5A | | 1ZKEA | | 1ZL0A | | 1ZLDA | | 1ZMAA | | 1ZMTA | | 1ZN6A | | 1ZPSA | | 1ZS9A | | 1ZSQA | | 1ZT3A | | 1ZTDA | | 1ZUUA | | 1ZV1A | | 1ZVAA | | 1ZVTA | | 1ZX8A | | 1ZXXA | | 1ZY7A | | 1ZZ1A | | 1ZZKA | | 256BA | | 2A14A | | 2A1HA | | 2A1IA | | 2A1KA | | 2A26A | | 2A2KA | | 2A2MA | | 2A35A | | 2A3NA | | | 2A40B | | --- | | 2A4XA | | 2A65A | | 2A6SA | | 2A6ZA | | 2A72A | | 2A7BA | | 2A8YA | | 2A9DA | | 2A9IA | | 2A9SA | | 2ABKA | | 2ABSA | | 2AEBA | | 2AEUA | | 2AFWA | | 2AG4A | | 2AGKA | | 2AHFA | | 2AIBA | | 2AJ6A | | 2AJ7A | | 2AKAB | | 2AKZA | | 2AMHA | | 2AMLA | | 2ANXA | | 2AO9A | | 2AP3A | | 2APJA | | 2APOB | | 2AQ6A | | 2ASKA | | 2ATZA | | 2AU7A | | 2AUWA | | 2AVDA | | 2AVTA | | 2AXCA | | 2AXOA | | 2AXWA | | 2AYDA | | 2AZ4A | | 2B06A | | | 2B0AA | | --- | | 2B0TA | | 2B0VA | | 2B1YA | | 2B3GA | | 2B4HA | | 2B4VA | | 2B4WA | | 2B50A | | 2B5AA | | 2B5GA | | 2B5WA | | 2B7KA | | 2B82A | | 2B8IA | | 2B8MA | | 2B97A | | 2B9DA | | 2B9EA | | 2BA2A | | 2BAYA | | 2BB6A | | 2BBAA | | 2BBEA | | 2BBRA | | 2BCMA | | 2BDRA | | 2BEKA | | 2BEMA | | 2BF6A | | 2BFDA | | 2BFDB | | 2BG1A | | 2BG5A | | 2BGIA | | 2BHUA | | 2BI0A | | 2BJFA | | 2BJIA | | 2BJKA | | 2BJNA | | 2BJQA | | 2BJVA | | 2BKFA | | | 2BKMA | | --- | | 2BKXA | | 2BKYA | | 2BL0A | | 2BL8A | | 2BLNA | | 2BM5A | | 2BMOA | | 2BMOB | | 2BMWA | | 2BNLA | | 2BNMA | | 2BO9B | | 2BOGX | | 2BONA | | 2BOUA | | 2BPTA | | 2BRFA | | 2BRJA | | 2BRYA | | 2BS2B | | 2BS2C | | 2BSJA | | 2BT9A | | 2BTIA | | 2BU3A | | 2BUEA | | 2BW3B | | 2BWFA | | 2BWQA | | 2BWRA | | 2BZ1A | | 2BZVA | | 2C0GA | | 2C0HA | | 2C0NA | | 2C1VA | | 2C2IA | | 2C2QA | | 2C2UA | | 2C3VA | | 2C4XA | | 2C5AA | | 2C5LC | | | 2C61A | | --- | | 2C6QA | | 2C71A | | 2C78A | | 2C82A | | 2C8EE | | 2C8MA | | 2C92A | | 2C9WA | | 2CARA | | 2CAYA | | 2CB2A | | 2CB8A | | 2CBZA | | 2CC6A | | 2CCHB | | 2CCMA | | 2CCQA | | 2CCVA | | 2CDUA | | 2CE2X | | 2CFUA | | 2CG7A | | 2CH5A | | 2CHCA | | 2CHHA | | 2CHOA | | 2CI1A | | 2CIBA | | 2CIUA | | 2CIWA | | 2CJ4A | | 2CJSC | | 2CJTA | | 2CKKA | | 2CKLB | | 2CKXA | | 2CM4A | | 2CMGA | | 2CMPA | | 2CN3A | | 2CNQA | | 2CO3A | | 2COVD | |
| | 2CPGA | | --- | | 2CS7A | | 2CU3A | | 2CUAA | | 2CVDA | | 2CVEA | | 2CW9A | | 2CWRA | | 2CWSA | | 2CWYA | | 2CWZA | | 2CX1A | | 2CX7A | | 2CXAA | | 2CXCA | | 2CXHA | | 2CXIA | | 2CXKA | | 2CXNA | | 2CXYA | | 2CY5A | | 2CYGA | | 2CYJA | | 2CZLA | | 2CZSA | | 2CZVC | | 2D0OA | | 2D1LA | | 2D1SA | | 2D28C | | 2D29A | | 2D3DA | | 2D48A | | 2D4PA | | 2D4XA | | 2D59A | | 2D5BA | | 2D5FA | | 2D5MA | | 2D5WA | | 2D68A | | 2D7CC | | 2D7VA | | 2D80A | | | 2D8DA | | --- | | 2DB7A | | 2DBNA | | 2DBYA | | 2DC4A | | 2DCFA | | 2DDRA | | 2DDXA | | 2DE3A | | 2DE6A | | 2DEJA | | 2DG1A | | 2DG5A | | 2DGKA | | 2DJFA | | 2DJIA | | 2DKHA | | 2DKJA | | 2DKOA | | 2DKOB | | 2DLBA | | 2DM9A | | 2DOKA | | 2DP9A | | 2DPFA | | 2DPLA | | 2DPMA | | 2DQAA | | 2DQLA | | 2DQWA | | 2DS2B | | 2DS5A | | 2DSJA | | 2DSKA | | 2DSTA | | 2DSXA | | 2DSYA | | 2DT8A | | 2DTJA | | 2DVMA | | 2DVTA | | 2DWKA | | 2DWUA | | 2DXAA | | | 2DXQA | | --- | | 2DXUA | | 2DY0A | | 2DYIA | | 2DYJA | | 2DYOA | | 2DYOB | | 2E01A | | 2E11A | | 2E1FA | | 2E1VA | | 2E1ZA | | 2E2DC | | 2E2OA | | 2E3HA | | 2E3NA | | 2E4MC | | 2E4TA | | 2E56A | | 2E5FA | | 2E5YA | | 2E6FA | | 2E6MA | | 2E6XA | | 2E7VA | | 2E7ZA | | 2E85A | | 2E8BA | | 2E8EA | | 2E8VA | | 2EABA | | 2EAQA | | 2EB4A | | 2EBEA | | 2EBNA | | 2EBOA | | 2ECEA | | 2EFJA | | 2EFVA | | 2EGVA | | 2EGZA | | 2EH3A | | 2EHPA | | 2EHZA | | | 2EI9A | | --- | | 2EJAA | | 2EJXA | | 2EK0A | | 2EKLA | | 2ELCA | | 2ENDA | | 2ENGA | | 2EPLX | | 2EQ7C | | 2ERBA | | 2ERFA | | 2ERLA | | 2ERVA | | 2ES9A | | 2ESSA | | 2ETJA | | 2ETVA | | 2ETXA | | 2EV1A | | 2EVBA | | 2EW0A | | 2EWTA | | 2EX0A | | 2EX2A | | 2EX4A | | 2EZ2A | | 2F01A | | 2F1FA | | 2F1KA | | 2F1NA | | 2F22A | | 2F23A | | 2F2EA | | 2F2HA | | 2F46A | | 2F4MA | | 2F4MB | | 2F5GA | | 2F5TX | | 2F5XA | | 2F60K | | 2F62A | | 2F6EA | | | 2F6UA | | --- | | 2F7VA | | 2F9FA | | 2F9HA | | 2FA1A | | 2FA8A | | 2FAOA | | 2FB5A | | 2FB6A | | 2FBAA | | 2FBLA | | 2FCJA | | 2FCKA | | 2FCLA | | 2FCOA | | 2FCTA | | 2FCWA | | 2FCWB | | 2FD4A | | 2FD6U | | 2FDNA | | 2FE3A | | 2FE8A | | 2FEAA | | 2FEFA | | 2FFUA | | 2FG1A | | 2FGQX | | 2FH1A | | 2FHFA | | 2FHPA | | 2FHZA | | 2FHZB | | 2FI1A | | 2FI9A | | 2FIPA | | 2FIUA | | 2FJ8A | | 2FJRA | | 2FKKA | | 2FL7A | | 2FLHA | | 2FM9A | | 2FMAA | | | 2FNAA | | --- | | 2FOJA | | 2FOMA | | 2FOMB | | 2FOZA | | 2FP1A | | 2FPHX | | 2FQ3A | | 2FQXA | | 2FR5A | | 2FREA | | 2FRGP | | 2FSHA | | 2FSQA | | 2FSRA | | 2FSUA | | 2FT0A | | 2FTRA | | 2FTXA | | 2FTXB | | 2FUEA | | 2FUFA | | 2FULA | | 2FUPA | | 2FURA | | 2FVYA | | 2FWHA | | 2FWTA | | 2FXUA | | 2FY7A | | 2FYGA | | 2FYQA | | 2FZSA | | 2G0WA | | 2G2CA | | 2G30A | | 2G3RA | | 2G3WA | | 2G40A | | 2G45A | | 2G5FA | | 2G5GX | | 2G64A | | 2G7BA | | | 2G7IA | | --- | | 2G7OA | | 2G7SA | | 2G82A | | 2G84A | | 2G8SA | | 2G9WA | | 2GA1A | | 2GAGB | | 2GAGC | | 2GAGD | | 2GAKA | | 2GAUA | | 2GAXA | | 2GB4A | | 2GCIA | | 2GDMA | | 2GDQA | | 2GF6A | | 2GFFA | | 2GGCA | | 2GHSA | | 2GHTA | | 2GIAA | | 2GIBA | | 2GIYA | | 2GJ3A | | 2GJ4A | | 2GJLA | | 2GK4A | | 2GKEA | | 2GKGA | | 2GKPA | | 2GLZA | | 2GMQA | | 2GNOA | | 2GNPA | | 2GOMA | | 2GPEA | | 2GPIA | | 2GR8A | | 2GRCA | | 2GRRB | | 2GS5A | |
| | 2GS8A | | --- | | 2GSOA | | 2GSVA | | 2GT1A | | 2GTRA | | 2GU3A | | 2GU9A | | 2GUDA | | 2GUFA | | 2GUIA | | 2GUKA | | 2GUYA | | 2GUZB | | 2GVIA | | 2GVKA | | 2GWMA | | 2GWNA | | 2GX5A | | 2GXQA | | 2GYQA | | 2GZ4A | | 2GZ6A | | 2GZBA | | 2GZQA | | 2GZSA | | 2H00A | | 2H1CA | | 2H1TA | | 2H1VA | | 2H26A | | 2H2ZA | | 2H5OA | | 2H62C | | 2H6FA | | 2H6FB | | 2H7MA | | 2H7ZA | | 2H88A | | 2H88C | | 2H88D | | 2H8EA | | 2H8GA | | 2H98A | | 2H9AB | | | 2H9DA | | --- | | 2HA8A | | 2HAIA | | 2HALA | | 2HBAA | | 2HBTA | | 2HBWA | | 2HC1A | | 2HC8A | | 2HCMA | | 2HD9A | | 2HDWA | | 2HEUA | | 2HEWF | | 2HF1A | | 2HFKA | | 2HFNA | | 2HFTA | | 2HHCA | | 2HHPA | | 2HI0A | | 2HIMA | | 2HINA | | 2HIYA | | 2HJEA | | 2HJNA | | 2HK0A | | 2HKVA | | 2HL7A | | 2HLJA | | 2HLRA | | 2HLYA | | 2HLZA | | 2HNGA | | 2HNUA | | 2HO3A | | 2HOXA | | 2HP0A | | 2HP7A | | 2HQ2A | | 2HQ7A | | 2HQLA | | 2HQSA | | 2HQSC | | | 2HQTA | | --- | | 2HQXA | | 2HQYA | | 2HRAA | | 2HS1A | | 2HSBA | | 2HSIA | | 2HTSA | | 2HU9A | | 2HUEB | | 2HUEC | | 2HUHA | | 2HVWA | | 2HW2A | | 2HX0A | | 2HX5A | | 2HY5A | | 2HY5C | | 2HY7A | | 2HYKA | | 2HZCA | | 2HZLA | | 2I0KA | | 2I2CA | | 2I33A | | 2I49A | | 2I4LA | | 2I53A | | 2I5HA | | 2I5IA | | 2I5UA | | 2I5VO | | 2I6CA | | 2I6HA | | 2I74A | | 2I7AA | | 2I7DA | | 2I7GA | | 2I7NA | | 2I8DA | | 2I8GA | | 2I8TA | | 2I9CA | | 2I9FA | | | 2I9IA | | --- | | 2I9WA | | 2I9XA | | 2IA1A | | 2IA7A | | 2IAYA | | 2IB0A | | 2IBAA | | 2IBLA | | 2IBNA | | 2IC2A | | 2IC6A | | 2ICHA | | 2ICUA | | 2ICYA | | 2ID4A | | 2IDLA | | 2IF6A | | 2IGIA | | 2IGPA | | 2IGXA | | 2II2A | | 2IIAA | | 2IIHA | | 2IJ2A | | 2IKSA | | 2ILKA | | 2ILRA | | 2IM8A | | 2IM9A | | 2IMFA | | 2IMHA | | 2IMJA | | 2IMQX | | 2IMRA | | 2IMSA | | 2IN0A | | 2IN3A | | 2INCB | | 2INUA | | 2INWA | | 2IP1A | | 2IP6A | | 2IPIA | | | 2IQYA | | --- | | 2ISBA | | 2IT2A | | 2IT9A | | 2ITEA | | 2IU5A | | 2IUWA | | 2IVFC | | 2IVNA | | 2IVYA | | 2IW1A | | 2IWAA | | 2IWBA | | 2IWRA | | 2IXDA | | 2IXMA | | 2IXSA | | 2IY2A | | 2IYFA | | 2IYVA | | 2IZ6A | | 2IZRA | | 2IZXA | | 2J0AA | | 2J1PA | | 2J1VA | | 2J43A | | 2J5GA | | 2J5YA | | 2J66A | | 2J6AA | | 2J6BA | | 2J6GA | | 2J6LA | | 2J6VA | | 2J73A | | 2J7JA | | 2J7QA | | 2J7UA | | 2J8BA | | 2J8KA | | 2J8WA | | 2J97A | | 2J9CA | | | 2J9OA | | --- | | 2J9UB | | 2J9WA | | 2JC5A | | 2JC9A | | 2JCBA | | 2JCQA | | 2JDCA | | 2JDID | | 2JDIG | | 2JDIH | | 2JDII | | 2JDJA | | 2JE3A | | 2JE6A | | 2JE6B | | 2JE6I | | 2JE8A | | 2JEKA | | 2JEPA | | 2JFRA | | 2JG0A | | 2JGBA | | 2JGPA | | 2JH1A | | 2JH3A | | 2JHFA | | 2JHNA | | 2JK9A | | 2JKGA | | 2JKHL | | 2JLIA | | 2JLQA | | 2LISA | | 2MBRA | | 2MCMA | | 2MHRA | | 2NL9A | | 2NLRA | | 2NLVA | | 2NMLA | | 2NNUA | | 2NOOA | | 2NP5A | | | 2NPNA | | --- | | 2NPTA | | 2NPTB | | 2NQ5A | | 2NQLA | | 2NQWA | | 2NR5A | | 2NR7A | | 2NRKA | | 2NRLA | | 2NRRA | | 2NS9A | | 2NSAA | | 2NSZA | | 2NT0A | | 2NTPA | | 2NUHA | | 2NUJA | | 2NVHA | | 2NVOA | | 2NW2A | | 2NW8A | | 2NWFA | | 2NWHA | | 2NX2A | | 2NX4A | | 2NXFA | | 2NXVA | | 2NY1A | | 2NYDA | | 2NYIA | | 2NZ7A | | 2NZCA | | 2NZXA | | 2O02A | | 2O0AA | | 2O0BA | | 2O0MA | | 2O0QA | | 2O1KA | | 2O1MA | | 2O1QA | | 2O2KA | | 2O2XA | |
| | 2O30A | | --- | | 2O34A | | 2O36A | | 2O38A | | 2O4TA | | 2O4UX | | 2O4VA | | 2O5HA | | 2O5UA | | 2O62A | | 2O6FA | | 2O6PA | | 2O6SA | | 2O70A | | 2O71A | | 2O7AA | | 2O7IA | | 2O7MA | | 2O8MA | | 2O8PA | | 2O8QA | | 2O90A | | 2O95A | | 2O99A | | 2O9CA | | 2O9SA | | 2O9UX | | 2OA9A | | 2OAFA | | 2OB3A | | 2OB5A | | 2OBPA | | 2OC5A | | 2OCTA | | 2OD4A | | 2OD5A | | 2OD6A | | 2ODAA | | 2ODFA | | 2ODHA | | 2ODKA | | 2OEBA | | 2OEEA | | 2OEZA | | | 2OF3A | | --- | | 2OFCA | | 2OFKA | | 2OFZA | | 2OG4A | | 2OGBA | | 2OGFA | | 2OGXA | | 2OH3A | | 2OH5A | | 2OHWA | | 2OITA | | 2OIWA | | 2OIXA | | 2OIZA | | 2OIZD | | 2OJ5A | | 2OJPA | | 2OKFA | | 2OKMA | | 2OKTA | | 2OKUA | | 2OLMA | | 2OLRA | | 2OLTA | | 2OMLA | | 2OMZB | | 2OO3A | | 2OOAA | | 2OOKA | | 2OPCA | | 2OPLA | | 2OQ0A | | 2OQBA | | 2OQKA | | 2OQQA | | 2OQZA | | 2ORWA | | 2OS0A | | 2OSOA | | 2OSXA | | 2OTMA | | 2OU1A | | 2OU3A | | | 2OU5A | | --- | | 2OU6A | | 2OUFA | | 2OV0A | | 2OVGA | | 2OVJA | | 2OVSA | | 2OWAA | | 2OX6A | | 2OX7A | | 2OXGB | | 2OXLA | | 2OXOA | | 2OY9A | | 2OYAA | | 2OYOA | | 2OYZA | | 2OZJA | | 2OZNA | | 2OZTA | | 2P02A | | 2P08A | | 2P09A | | 2P0AA | | 2P0NA | | 2P0SA | | 2P0WA | | 2P12A | | 2P14A | | 2P1MA | | 2P1MB | | 2P26A | | 2P2SA | | 2P38A | | 2P3PA | | 2P3YA | | 2P45B | | 2P4FA | | 2P4HX | | 2P4OA | | 2P4PA | | 2P51A | | 2P58A | | 2P58B | | | 2P58C | | --- | | 2P5KA | | 2P65A | | 2P67A | | 2P6PA | | 2P6VA | | 2P6WA | | 2P8GA | | 2P8IA | | 2P97A | | 2P9BA | | 2P9WA | | 2P9XA | | 2PA7A | | 2PA8D | | 2PA8L | | 2PAGA | | 2PBDP | | 2PBDV | | 2PBIB | | 2PBKA | | 2PC1A | | 2PC8A | | 2PD1A | | 2PEFA | | 2PEQA | | 2PFIA | | 2PFZA | | 2PGEA | | 2PGNA | | 2PH0A | | 2PHNA | | 2PIEA | | 2PK8A | | 2PKEA | | 2PKFA | | 2PKHA | | 2PMAA | | 2PMRA | | 2PMUA | | 2PN1A | | 2PN6A | | 2PNDA | | 2PNEA | | | 2PNQA | | --- | | 2PNWA | | 2PO4A | | 2POFA | | 2PORA | | 2PPNA | | 2PPQA | | 2PPVA | | 2PPXA | | 2PQ7A | | 2PQ8A | | 2PQRA | | 2PQRC | | 2PQXA | | 2PR7A | | 2PRSA | | 2PRVA | | 2PRXA | | 2PS1A | | 2PSTX | | 2PTHA | | 2PTMA | | 2PTRA | | 2PTTB | | 2PU3A | | 2PU9A | | 2PU9B | | 2PUYA | | 2PV2A | | 2PV4A | | 2PVBA | | 2PVQA | | 2PW0A | | 2PWWA | | 2PXXA | | 2PYQA | | 2PYWA | | 2PYXA | | 2Q03A | | 2Q09A | | 2Q0OA | | 2Q0SA | | 2Q0ZX | | 2Q12A | | | 2Q2GA | | --- | | 2Q35A | | 2Q3TA | | 2Q40A | | 2Q43A | | 2Q46A | | 2Q48A | | 2Q4FA | | 2Q4MA | | 2Q4NA | | 2Q4ZA | | 2Q5CA | | 2Q6KA | | 2Q6QA | | 2Q79A | | 2Q7SA | | 2Q7WA | | 2Q82A | | 2Q88A | | 2Q8GA | | 2Q8KA | | 2Q8PA | | 2Q9FA | | 2Q9KA | | 2Q9OA | | 2Q9RA | | 2QACA | | 2QAHA | | 2QAPA | | 2QB7A | | 2QC1B | | 2QCKA | | 2QCPX | | 2QCVA | | 2QDJA | | 2QE8A | | 2QEDA | | 2QEEA | | 2QEUA | | 2QF4A | | 2QFAA | | 2QFAB | | 2QFAC | | 2QFEA | | | 2QFFA | | --- | | 2QGUA | | 2QGYA | | 2QH9A | | 2QHFA | | 2QHKA | | 2QHOB | | 2QHPA | | 2QHQA | | 2QIAA | | 2QIKA | | 2QIMA | | 2QIPA | | 2QIYC | | 2QJLA | | 2QJVA | | 2QJWA | | 2QJZA | | 2QK1A | | 2QKDA | | 2QKFA | | 2QKHA | | 2QKHB | | 2QKPA | | 2QL8A | | 2QLTA | | 2QLWA | | 2QMAA | | 2QMCB | | 2QMJA | | 2QMLA | | 2QMMA | | 2QNGA | | 2QNIA | | 2QNLA | | 2QOLA | | 2QORA | | 2QP2A | | 2QPXA | | 2QQ4A | | 2QQ9A | | 2QR6A | | 2QRLA | | 2QRUA | |
| | 2QSAA | | --- | | 2QSBA | | 2QSIA | | 2QSKA | | 2QSQA | | 2QSWA | | 2QSXA | | 2QT1A | | 2QT7A | | 2QTCA | | 2QTDA | | 2QTSA | | 2QTWA | | 2QUDA | | 2QUOA | | 2QUPA | | 2QV5A | | 2QV6A | | 2QV8A | | 2QVOA | | 2QW5A | | 2QWOB | | 2QWUA | | 2QWXA | | 2QXFA | | 2QY1A | | 2QY6A | | 2QYCA | | 2QYWA | | 2QZCA | | 2QZQA | | 2R01A | | 2R0XA | | 2R16A | | 2R1IA | | 2R25A | | 2R2AA | | 2R2CA | | 2R2YA | | 2R2ZA | | 2R31A | | 2R47A | | 2R4FA | | 2R4GA | | | 2R4IA | | --- | | 2R4QA | | 2R5DA | | 2R5OA | | 2R5UA | | 2R6JA | | 2R6OA | | 2R6UA | | 2R6ZA | | 2R751 | | 2R7DA | | 2R7GA | | 2R85A | | 2R8EA | | 2R8OA | | 2R9FA | | 2RA6A | | 2RA8A | | 2RA9A | | 2RB7A | | 2RB8A | | 2RBBA | | 2RBDA | | 2RBGA | | 2RBKA | | 2RC3A | | 2RDCA | | 2RDEA | | 2RDGA | | 2RDIA | | 2RDKA | | 2RDMA | | 2RDQA | | 2RDXA | | 2REEA | | 2RERA | | 2REUA | | 2RFFA | | 2RFQA | | 2RG4A | | 2RG8A | | 2RGIA | | 2RH0A | | 2RH2A | | | 2RH3A | | --- | | 2RHFA | | 2RIJA | | 2RILA | | 2RINA | | 2RIQA | | 2RIVA | | 2RIVB | | 2RJ2A | | 2RJIA | | 2RK3A | | 2RK9A | | 2RKLA | | 2RKNA | | 2RKQA | | 2RKVA | | 2RL8A | | 2RLDA | | 2SAKA | | 2SICI | | 2SPCA | | 2SQCA | | 2TGIA | | 2TNFA | | 2TPSA | | 2UUIA | | 2UURA | | 2UUUA | | 2UUYB | | 2UV4A | | 2UVJA | | 2UVKA | | 2UVOA | | 2UVPA | | 2UW1A | | 2UWAA | | 2UWJE | | 2UXQA | | 2UXYA | | 2UY1A | | 2UY2A | | 2UYOA | | 2UYTA | | 2UYZB | | | 2UZ1A | | --- | | 2UZCA | | 2V05A | | 2V0PA | | 2V1MA | | 2V1OA | | 2V1TA | | 2V26A | | 2V2GA | | 2V2PA | | 2V33A | | 2V3GA | | 2V3IA | | 2V3KA | | 2V3SA | | 2V4XA | | 2V6VA | | 2V6XA | | 2V6XB | | 2V75A | | 2V76A | | 2V79A | | 2V7FA | | 2V7KA | | 2V84A | | 2V89A | | 2V8HA | | 2V8IA | | 2V8TA | | 2V94A | | 2V9KA | | 2V9LA | | 2V9VA | | 2VB1A | | 2VBKA | | 2VBUA | | 2VC8A | | 2VCHA | | 2VCLA | | 2VDFA | | 2VDJA | | 2VE8A | | 2VEBA | | 2VECA | | | 2VESA | | --- | | 2VFKA | | 2VFOA | | 2VFRA | | 2VFXA | | 2VG0A | | 2VGOC | | 2VGXA | | 2VH3A | | 2VHAA | | 2VHBA | | 2VHJA | | 2VHKA | | 2VJIA | | 2VK2A | | 2VK8A | | 2VKJA | | 2VLGA | | 2VLIA | | 2VLQA | | 2VLQB | | 2VM9A | | 2VN6A | | 2VN6B | | 2VNGA | | 2VO4A | | 2VOKA | | 2VOVA | | 2VPAA | | 2VPBA | | 2VPNA | | 2VPTA | | 2VQ2A | | 2VQ4A | | 2VQGA | | 2VQPA | | 2VROA | | 2VRSA | | 2VRWB | | 2VS0A | | 2VSMA | | 2VSMB | | 2VTCA | | 2VTWA | | | 2VUWA | | --- | | 2VV6A | | 2VVEA | | 2VVPA | | 2VWSA | | 2VXGA | | 2VXNA | | 2VXQA | | 2VXTI | | 2VXZA | | 2VY8A | | 2VZCA | | 2VZPA | | 2W08A | | 2W0GA | | 2W15A | | 2W18A | | 2W1JA | | 2W1RA | | 2W1SA | | 2W1ZA | | 2W2EA | | 2W2RA | | 2W31A | | 2W39A | | 2W3GA | | 2W3PA | | 2W3QA | | 2W3XA | | 2W3YA | | 2W40A | | 2W50A | | 2W5EA | | 2W5NA | | 2W5QA | | 2W61A | | 2W6AA | | 2W6KA | | 2W7AA | | 2W7ZA | | 2W83C | | 2W86A | | 2W8TA | | 2W8XA | | | 2W91A | | --- | | 2W9YA | | 2WAGA | | 2WAOA | | 2WBFX | | 2WBMA | | 2WBNA | | 2WCJA | | 2WCRA | | 2WCWA | | 2WDCA | | 2WE3A | | 2WEWA | | 2WFIA | | 2WFOA | | 2WFPA | | 2WFWA | | 2WG7A | | 2WH7A | | 2WHLA | | 2WHMA | | 2WI8A | | 2WIYA | | 2WJ1A | | 2WJ5A | | 2WJEA | | 2WJNC | | 2WJRA | | 2WJWA | | 2WK1A | | 2WKJA | | 2WLGA | | 2WLUA | | 2WLVA | | 2WN9A | | 2WNFA | | 2WNPF | | 2WNXA | | 2WOLA | | 2WOZA | | 2WQIA | | 2WQKA | | 2WQPA |   2WUUA |
| | 2WUXA | | --- | | 2WVXA | | 2WWXB | | 2WYAA | | 2WYEA | | 2WYEB | | 2WZ1A | | 2WZGA | | 2YQCA | | 2YV4A | | 2YVIA | | 2YVQA | | 2YVRA | | 2YVSA | | 2YVTA | | 2YWIA | | 2YWWA | | 2YXNA | | 2YXOA | | 2YYKA | | 2YYOA | | 2YZHA | | 2YZSA | | 2YZTA | | 2YZYA | | 2Z08A | | 2Z0AA | | 2Z0BA | | 2Z0DA | | 2Z0JA | | 2Z0QA | | 2Z0TA | | 2Z0XA | | 2Z10A | | 2Z14A | | 2Z1CA | | 2Z1EA | | 2Z26A | | 2Z2NA | | 2Z30B | | 2Z3QA | | 2Z3QB | | 2Z51A | | 2Z5BA | | | 2Z5BB | | --- | | 2Z5EA | | 2Z5WA | | 2Z6FA | | 2Z6OA | | 2Z6RA | | 2Z72A | | 2Z7FI | | 2Z84A | | 2Z8FA | | 2Z8ZA | | 2Z98A | | 2Z9WA | | 2ZA0A | | 2ZA4B | | 2ZAYA | | 2ZB4A | | 2ZBCA | | 2ZBIA | | 2ZBLA | | 2ZCAA | | 2ZCMA | | 2ZCOA | | 2ZCWA | | 2ZD7A | | 2ZDHA | | 2ZDPA | | 2ZE3A | | 2ZEXA | | 2ZF9A | | 2ZFDA | | 2ZFDB | | 2ZFGA | | 2ZFYA | | 2ZFZA | | 2ZGIA | | 2ZGLA | | 2ZGYA | | 2ZHJA | | 2ZHNA | | 2ZHPA | | 2ZJ3A | | 2ZK9X | | 2ZKMX | | | 2ZKZA | | --- | | 2ZL7A | | 2ZNRA | | 2ZOGA | | 2ZOSA | | 2ZOUA | | 2ZPMA | | 2ZPTX | | 2ZPUA | | 2ZQ0A | | 2ZQ5A | | 2ZQEA | | 2ZQMA | | 2ZQOA | | 2ZS0D | | 2ZSIB | | 2ZSJA | | 2ZUVA | | 2ZUXA | | 2ZVYA | | 2ZW2A | | 2ZWAA | | 2ZWSA | | 2ZWUA | | 2ZX2A | | 2ZXYA | | 2ZYHA | | 2ZYJA | | 2ZYZB | | 2ZZDA | | 2ZZJA | | 2ZZVA | | 3A07A | | 3A0YA | | 3A1GA | | 3A1GB | | 3A35A | | 3A39A | | 3A4CA | | 3A9IA | | 3B2YA | | 3B33A | | 3B34A | | 3B44A | | | 3B47A | | --- | | 3B49A | | 3B4NA | | 3B4QA | | 3B4UA | | 3B50A | | 3B5EA | | 3B5MA | | 3B5OA | | 3B64A | | 3B6EA | | 3B6HA | | 3B79A | | 3B7CA | | 3B7LA | | 3B7SA | | 3B8FA | | 3B9OA | | 3B9TA | | 3B9WA | | 3BA1A | | 3BA3A | | 3BB0A | | 3BB7A | | 3BBBA | | 3BBYA | | 3BC1B | | 3BC9A | | 3BCWA | | 3BCYA | | 3BDUA | | 3BDVA | | 3BE6A | | 3BEDA | | 3BEIA | | 3BEMA | | 3BEOA | | 3BEXA | | 3BF7A | | 3BFMA | | 3BFOA | | 3BFQG | | 3BFVA | | 3BGEA | | | 3BGYA | | --- | | 3BHDA | | 3BHNA | | 3BHOA | | 3BHWA | | 3BHYA | | 3BI1A | | 3BI7A | | 3BIOA | | 3BIQA | | 3BIYA | | 3BJ4A | | 3BJDA | | 3BJEA | | 3BJNA | | 3BK5A | | 3BKXA | | 3BL9A | | 3BLDA | | 3BLZA | | 3BM1A | | 3BM4A | | 3BMXA | | 3BMZA | | 3BN0A | | 3BNEA | | 3BNYA | | 3BO6A | | 3BODA | | 3BOEA | | 3BOFA | | 3BOGA | | 3BONA | | 3BP1A | | 3BP6A | | 3BP6B | | 3BPJA | | 3BPKA | | 3BPTA | | 3BPVA | | 3BPWA | | 3BQ9A | | 3BQAA | | 3BQKA | | | 3BQOA | | --- | | 3BQPA | | 3BQXA | | 3BRCA | | 3BS2A | | 3BS3A | | 3BS4A | | 3BS6A | | 3BT5A | | 3BUTA | | 3BUUA | | 3BUXB | | 3BV8A | | 3BVFA | | 3BVXA | | 3BWHA | | 3BWLA | | 3BWSA | | 3BWUD | | 3BWUF | | 3BWXA | | 3BWZA | | 3BXPA | | 3BXUA | | 3BY4A | | 3BY8A | | 3BY9A | | 3BYPA | | 3BYQA | | 3BZWA | | 3C0FB | | 3C18A | | 3C1AA | | 3C1QA | | 3C2EA | | 3C2QA | | 3C2UA | | 3C37A | | 3C4BA | | 3C4SA | | 3C57A | | 3C5KA | | 3C5NA | | 3C68A | | | 3C6AA | | --- | | 3C6KA | | 3C6WA | | 3C70A | | 3C7MA | | 3C7TA | | 3C7XA | | 3C8CA | | 3C8EA | | 3C8IA | | 3C8LA | | 3C8MA | | 3C8NA | | 3C8WA | | 3C8ZA | | 3C9AA | | 3C9FA | | 3C9HA | | 3C9IA | | 3C9PA | | 3C9QA | | 3C9UA | | 3CA7A | | 3CA8A | | 3CANA | | 3CBNA | | 3CBPA | | 3CBWA | | 3CBZA | | 3CCDA | | 3CECA | | 3CETA | | 3CEXA | | 3CG6A | | 3CGIA | | 3CGXA | | 3CH4B | | 3CHBD | | 3CHHA | | 3CHJA | | 3CHMA | | 3CHVA | | 3CI3A | | 3CI6A | |
| | 3CI9A | | --- | | 3CIJA | | 3CIMA | | 3CINA | | 3CITA | | 3CJ1A | | 3CJDA | | 3CJKB | | 3CJPA | | 3CJSA | | 3CJSB | | 3CJYA | | 3CK6A | | 3CKCA | | 3CKJA | | 3CKKA | | 3CKMA | | 3CL5A | | 3CL6A | | 3CLAA | | 3CLMA | | 3CM3A | | 3CMGA | | 3CNBA | | 3CNEA | | 3CNUA | | 3CNVA | | 3CNYA | | 3COVA | | 3CP0A | | 3CP3A | | 3CP7A | | 3CPGA | | 3CPQA | | 3CPTA | | 3CPTB | | 3CQ1A | | 3CQDA | | 3CQLA | | 3CSXA | | 3CT5A | | 3CT6A | | 3CTPA | | 3CTZA | | | 3CU2A | | --- | | 3CU9A | | 3CUZA | | 3CVEA | | 3CVJA | | 3CVOA | | 3CW9A | | 3CWNA | | 3CWRA | | 3CWVA | | 3CWWA | | 3CX5A | | 3CX5B | | 3CX5C | | 3CX5D | | 3CX5F | | 3CX5G | | 3CX5H | | 3CX5I | | 3CXNA | | 3CYPB | | 3CZ1A | | 3CZ6A | | 3CZPA | | 3CZXA | | 3D00A | | 3D02A | | 3D06A | | 3D0FA | | 3D0JA | | 3D0KA | | 3D0WA | | 3D1BA | | 3D1KA | | 3D1MA | | 3D1PA | | 3D1RA | | 3D2QA | | 3D2YA | | 3D30A | | 3D32A | | 3D33A | | 3D34A | | 3D3BA | | | 3D3BJ | | --- | | 3D3MA | | 3D3YA | | 3D47A | | 3D4EA | | 3D4UB | | 3D59A | | 3D6IA | | 3D6KA | | 3D6RA | | 3D7AA | | 3D7IA | | 3D7JA | | 3D85C | | 3D9NA | | 3D9XA | | 3DA0A | | 3DA4A | | 3DA5A | | 3DAAA | | 3DALA | | 3DANA | | 3DB2A | | 3DB7A | | 3DBOA | | 3DCDA | | 3DCMX | | 3DCZA | | 3DD7A | | 3DDCB | | 3DEFA | | 3DFFA | | 3DFGA | | 3DG6A | | 3DG9A | | 3DGPA | | 3DGPB | | 3DHAA | | 3DHFA | | 3DHUA | | 3DI4A | | 3DJEA | | 3DJHA | | 3DK9A | | | 3DKSA | | --- | | 3DLCA | | 3DLUA | | 3DMLA | | 3DMNA | | 3DN7A | | 3DNFA | | 3DNHA | | 3DNJA | | 3DNUA | | 3DNXA | | 3DNZA | | 3DO6A | | 3DOUA | | 3DQGA | | 3DQYA | | 3DR2A | | 3DR4A | | 3DR9A | | 3DRFA | | 3DRWA | | 3DS4A | | 3DSBA | | 3DSHA | | 3DSMA | | 3DSOA | | 3DSSA | | 3DSZA | | 3DT5A | | 3DTBA | | 3DTZA | | 3DUPA | | 3DXEA | | 3DXLA | | 3DXTA | | 3DYJA | | 3DZ1A | | 3DZAA | | 3DZZA | | 3E03A | | 3E05A | | 3E0EA | | 3E0XA | | 3E0ZA | | | 3E11A | | --- | | 3E19A | | 3E1EA | | 3E1RA | | 3E21A | | 3E2DA | | 3E2OA | | 3E2QA | | 3E2VA | | 3E3UA | | 3E3XA | | 3E48A | | 3E4GA | | 3E4VA | | 3E4WA | | 3E5UA | | 3E61A | | 3E7DA | | 3E7HA | | 3E7RL | | 3E86A | | 3E8OA | | 3E8TA | | 3E96A | | 3E9KA | | 3E9VA | | 3EA1A | | 3EA6A | | 3EAFA | | 3EBKA | | 3EBQA | | 3EBTA | | 3EBVA | | 3EC3A | | 3EC4A | | 3ECBB | | 3ECFA | | 3EDHA | | 3EDOA | | 3EDVA | | 3EE4A | | 3EEAA | | 3EEHA | | 3EEIA | | | 3EERA | | --- | | 3EF8A | | 3EFGA | | 3EFYA | | 3EGAA | | 3EH1A | | 3EHMA | | 3EI9A | | 3EIKA | | 3EINA | | 3EIPA | | 3EJ9A | | 3EJ9B | | 3EJKA | | 3EJNA | | 3EKIA | | 3EL6A | | 3ELFA | | 3ELJA | | 3ELKA | | 3ELLA | | 3ELNA | | 3ELQA | | 3EMFA | | 3EMHA | | 3EMIA | | 3EMRA | | 3EN8A | | 3ENBA | | 3ENUA | | 3EO5A | | 3EO6A | | 3EO7A | | 3EOIA | | 3EOJA | | 3EPVA | | 3EPWA | | 3EQNA | | 3EQXA | | 3ER6A | | 3ER7A | | 3ES4A | | 3ESLA | | 3ESMA | | | 3ESSA | | --- | | 3ETJA | | 3ETOA | | 3ETVA | | 3ETZA | | 3EURA | | 3EVFA | | 3EVYA | | 3EW0A | | 3EW8A | | 3EWNA | | 3EWYA | | 3EYEA | | 3EYTA | | 3EZIA | | 3F0DA | | 3F0HA | | 3F0PA | | 3F1LA | | 3F1PB | | 3F2EA | | 3F2KA | | 3F2ZA | | 3F3KA | | 3F40A | | 3F43A | | 3F47A | | 3F4MA | | 3F4SA | | 3F59A | | 3F5HA | | 3F62A | | 3F67A | | 3F6CA | | 3F6GA | | 3F6KA | | 3F6VA | | 3F6YA | | 3F75P | | 3F7EA | | 3F7LA | | 3F7QA | | 3F7WA | | 3F8MA | |
| | 3F8TA | | --- | | 3F8XA | | 3F95A | | 3F9MA | | 3F9SA | | 3F9XA | | 3FAPB | | 3FAUA | | 3FB9A | | 3FBLA | | 3FCIA | | 3FCNA | | 3FD3A | | 3FD5A | | 3FDGA | | 3FDHA | | 3FDJA | | 3FEAA | | 3FEGA | | 3FF1A | | 3FF2A | | 3FF5A | | 3FF9A | | 3FFDP | | 3FFRA | | 3FFVA | | 3FFYA | | 3FG8A | | 3FG9A | | 3FGHA | | 3FGRA | | 3FGRB | | 3FGVA | | 3FH1A | | 3FH2A | | 3FHDA | | 3FHFA | | 3FHLA | | 3FHVA | | 3FIAA | | 3FIDA | | 3FILA | | 3FJ1A | | 3FJUB | | | 3FJVA | | --- | | 3FK8A | | 3FKAA | | 3FKCA | | 3FKEA | | 3FL2A | | 3FM2A | | 3FMCA | | 3FMUA | | 3FN4A | | 3FN5A | | 3FO3A | | 3FO5A | | 3FO8D | | 3FOJA | | 3FOTA | | 3FOVA | | 3FPNA | | 3FPNB | | 3FPWA | | 3FQGA | | 3FQMA | | 3FR7A | | 3FRHA | | 3FRQA | | 3FS8A | | 3FSAA | | 3FSOA | | 3FSSA | | 3FSTA | | 3FTJA | | 3FUCA | | 3FUTA | | 3FVHA | | 3FVSA | | 3FVYA | | 3FW9A | | 3FWKA | | 3FWNA | | 3FWYA | | 3FWZA | | 3FX7A | | 3FYBA | | 3FYRA | | | 3FZ9A | | --- | | 3FZEA | | 3G02A | | 3G0MA | | 3G0OA | | 3G16A | | 3G1AA | | 3G1JA | | 3G1PA | | 3G1ZA | | 3G21A | | 3G23A | | 3G2BA | | 3G2EA | | 3G36A | | 3G3KA | | 3G3SA | | 3G3TA | | 3G40A | | 3G46A | | 3G48A | | 3G5BA | | 3G5SA | | 3G5TA | | 3G63A | | 3G7GA | | 3G7PA | | 3G7RA | | 3G7UA | | 3G85A | | 3G89A | | 3G8YA | | 3G98A | | 3G9RA | | 3GA3A | | 3GA4A | | 3GAEA | | 3GAZA | | 3GB5A | | 3GBWA | | 3GBYA | | 3GD0A | | 3GD6A | | 3GDWA | | | 3GE3A | | --- | | 3GE3C | | 3GE3E | | 3GF3A | | 3GF6A | | 3GFAA | | 3GFPA | | 3GFVA | | 3GG4A | | 3GG7A | | 3GGNA | | 3GGQA | | 3GGYA | | 3GHAA | | 3GI7A | | 3GIUA | | 3GIWA | | 3GIYA | | 3GJ8B | | 3GJYA | | 3GK6A | | 3GK7A | | 3GKJA | | 3GKNA | | 3GMGA | | 3GMIA | | 3GMXA | | 3GN6A | | 3GNEA | | 3GNLA | | 3GNZP | | 3GO5A | | 3GO9A | | 3GOCA | | 3GOEA | | 3GOHA | | 3GONA | | 3GP4A | | 3GPGA | | 3GQHA | | 3GQQA | | 3GR3A | | 3GR4A | | 3GREA | | | 3GRLA | | --- | | 3GS9A | | 3GVEA | | 3GVOA | | 3GWBA | | 3GWIA | | 3GWNA | | 3GWQA | | 3GXWA | | 3GY9A | | 3GYBA | | 3GYCA | | 3GYKA | | 3GZAA | | 3GZBA | | 3GZDA | | 3GZRA | | 3H05A | | 3H09A | | 3H0NA | | 3H0UA | | 3H12A | | 3H1DA | | 3H20A | | 3H2ZA | | 3H36A | | 3H3LA | | 3H4TA | | 3H51A | | 3H5LA | | 3H63A | | 3H6JA | | 3H6PA | | 3H6PC | | 3H6QA | | 3H6RA | | 3H74A | | 3H75A | | 3H79A | | 3H7CX | | 3H7HB | | 3H87A | | 3H87C | | 3H8HA | | | 3H8TA | | --- | | 3H8ZA | | 3H9CA | | 3H9MA | | 3H9WA | | 3HA2A | | 3HBMA | | 3HC1A | | 3HC7A | | 3HCJA | | 3HDOA | | 3HFOA | | 3HFTA | | 3HGLA | | 3HH1A | | 3HHSA | | 3HHTA | | 3HHTB | | 3HIDA | | 3HIUA | | 3HL1A | | 3HLFA | | 3HLZA | | 3HM4A | | 3HM5A | | 3HN0A | | 3HN5A | | 3HNOA | | 3HO6A | | 3HOIA | | 3HOLA | | 3HP4A | | 3HPCX | | 3HR0A | | 3HR6A | | 3HR9A | | 3HRGA | | 3HRLA | | 3HROA | | 3HRQA | | 3HSAA | | 3HSHA | | 3HSRA | | 3HT1A | | | 3HTUA | | --- | | 3HTYA | | 3HUPA | | 3HUUA | | 3HV8A | | 3HVIA | | 3HVWA | | 3HW5A | | 3HWPA | | 3HWUA | | 3HWWA | | 3HX8A | | 3HX9A | | 3HXJA | | 3HXLA | | 3HY0A | | 3HYNA | | 3HZ7A | | 3HZ8A | | 3HZPA | | 3I06A | | 3I09A | | 3I0ZA | | 3I24A | | 3I2VA | | 3I2ZA | | 3I31A | | 3I3QA | | 3I45A | | 3I4GA | | 3I4ZA | | 3I57A | | 3I7MA | | 3I84A | | 3I94A | | 3IARA | | 3IB5A | | 3IB7A | | 3IBWA | | 3IC3A | | 3IC4A | | 3ICVA | | 3ID1A | | 3IDBB | |
| | 3IDFA | | --- | | 3IDUA | | 3IE4A | | 3IE7A | | 3IEEA | | 3IFTA | | 3IG9A | | 3IGFA | | 3IGNA | | 3IGRA | | 3IGSA | | 3IHTA | | 3IHVA | | 3IISM | | 3IIXA | | 3IJ6A | | 3IJDA | | 3IJMA | | 3IJWA | | 3IKBA | | 3KK4A | | | 3IUOA | | --- | | 3IUWA | | 3IUZA | | 3IV0A | | 3IV4A | | 3IVVA | | 3IWFA | | 3IX3A | | 3JQ0A | | 3JQ1A | | 3JRNA | | 3JRVA | | 3JSLA | | 3JSRA | | 3JTFA | | 3JTWA | | 3JTXA | | 3JTZA | | 3JUIA | | 3JUMA | | 3JVLA | | | 3KC2A | | --- | | 3KD4A | | 3KD6A | | 3KDFA | | 3KDFB | | 3KDHA | | 3KDWA | | 3KE7A | | 3KEBA | | 3KEPA | | 3KEVA | | 3KEZA | | 3KF6A | | 3KF6B | | 3KG4A | | 3KGWA | | 3KGYA | | 3KGZA | | 3KH1A | | 3KHIA | | 3KIZA | | | 3PCGA | | --- | | 3PROC | | 3THIA | | 3TSSA | | 3VUBA | | 4MT2A | | 4UBPA | | 4UBPB | | 4UBPC | | 7A3HA | | 7AHLA | | 7ODCA | | 8ABPA | | 3IKWA | | 3ILVA | | 3ILWA | | 3ILXA | | 3IM6A | | 3IMKA | | 3IMMA | | 3JX9A | | | 3IP0A | | --- | | 3IP4C | | 3IPFA | | 3IPJA | | 3IR4A | | 3IRBA | | 3IS6A | | 3ISQA | | 3ISRA | | 3ISXA | | 3IT3A | | 3ITEA | | 3ITQA | | 3IUFA | | 3IUKA | | 3JXOA | | 3JXSA | | 3JY6A | | 3JYZA | | 3JZ0A | | 3K0ZA | | | 3K1TA | | --- | | 3K1UA | | 3K26A | | 3K29A | | 3K2OA | | 3K4IA | | 3K67A | | 3K69A | | 3K6OA | | 3K6QA | | 3K7CA | | 3K7XA | | 3K9DA | | 3KA5A | | 3KBGA | | 3KKGA | | 3KKIA | | 3KMIA | | 3KOGA | | 3KOJA |   3K12A | | 3KPEA | | --- | | 3KQ5A | | 3KR7A | | 3KS6A | | 3KS9A | | 3KSTA | | 3KTCA | | 3KTFA | | 3KTOA | | 3KUPA | | 3KV1A | | 3KWRA | | 3KWSA | | 3KYAA | | 3KZPA | | 3INOA | | 3IO3A | | 3KKBA | | 3KKFA | |
